# Supplementary material
Source: Springer Nature journal article supplement (https://www.springermedizin.de/resource/supplementary/13049_2013_796_MOESM1_ESM.pdf/9667234)

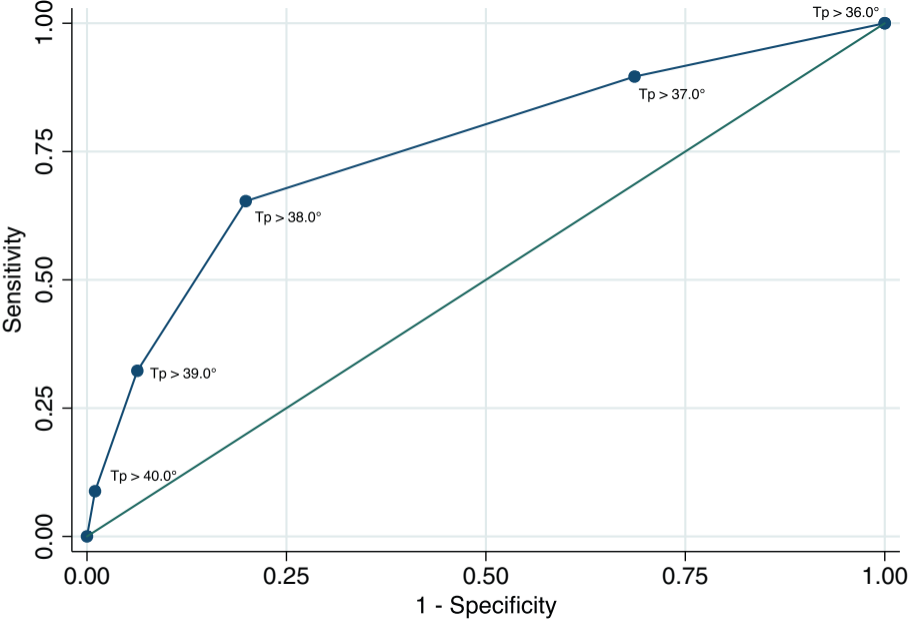

Area under ROC curve = 0.7525

Supplement: MOESM1 [file 9667234]
